# Supplementary material for: An NIR-driven biosensor based on the metal-enhanced fluorescence effect and a signal amplification strategy for miRNA detection
Source: Royal Society of Chemistry journal article supplement (doi:10.1039/d4ra07080a), 2024-01-01
Supplement: d4ra07080a1.pdf [file d4ra07080a1.pdf]

## Supporting information

### **An NIR-driven biosensor based on the metal-enhanced fluorescence effect and a signal amplification strategy for miRNA detection**

Dabin Liu<sup>1,2</sup>, Wenzhang Zhu<sup>3</sup>, Bin Qiu<sup>4</sup>, Shiqian Zhang<sup>5\*</sup>

1. The First Clinical College of Shandong University, Jinan, 250014, China
2. Department of Gynecology, Fujian Maternity and Child Health Hospital, College of Clinical Medicine for Obstetrics & Gynecology and Pediatrics, Fujian Medical University, Fuzhou, 350001, China
3. College of Materials Science and Engineering, Fuzhou University, Fuzhou, 350108, China
4. College of Chemistry, Fuzhou University, Fuzhou, 350108, China
5. Department of Gynecology, Qilu Hospital of Shandong University, Jinan, 250014, China

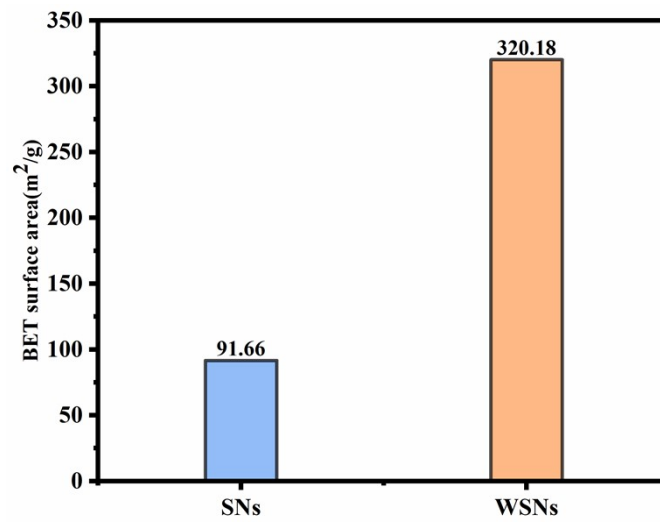

**Figure S1** Specific surface areas of the SNs and WSNs

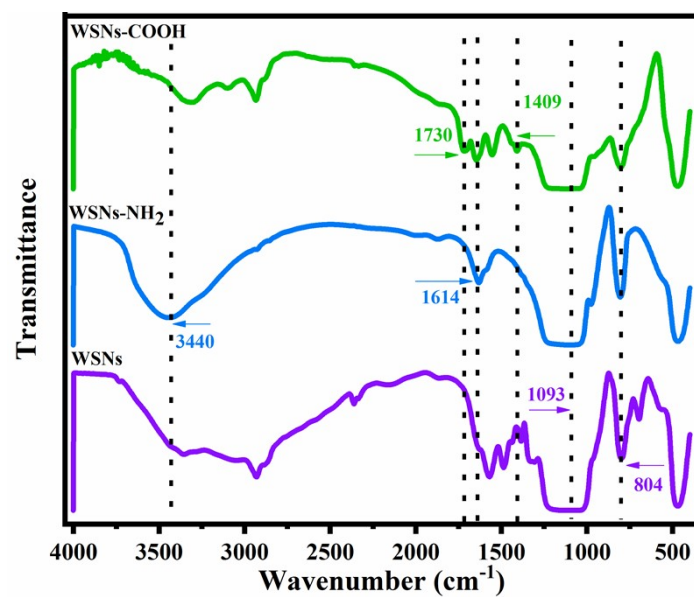

**Figure S2** FTIR spectra of WSNs, WSNs-NH<sub>2</sub> and WSNs-COOH

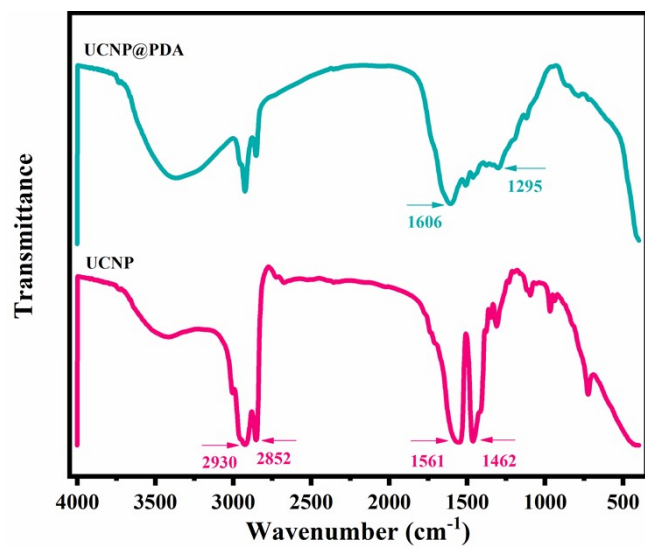

**Figure S3** FTIR spectra of UCNP (red line) and UCNP@PDA (cyan line)

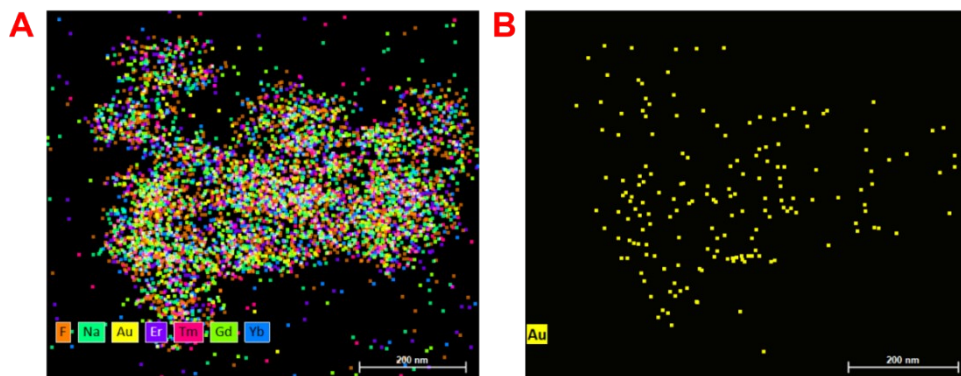

Figure S4 EDS spectrum of UP/Au

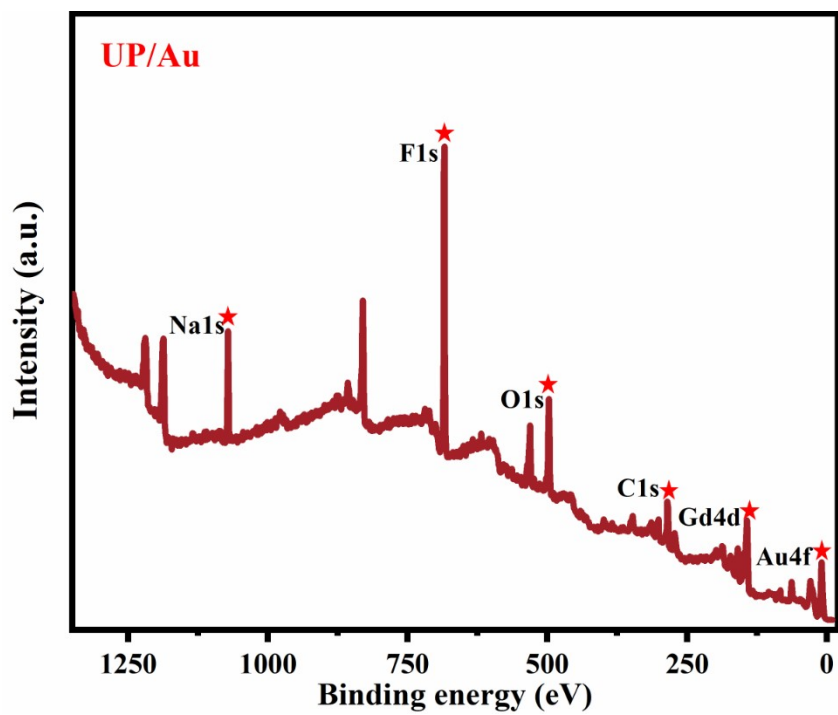

Figure S5 XPS spectrum of UP/Au

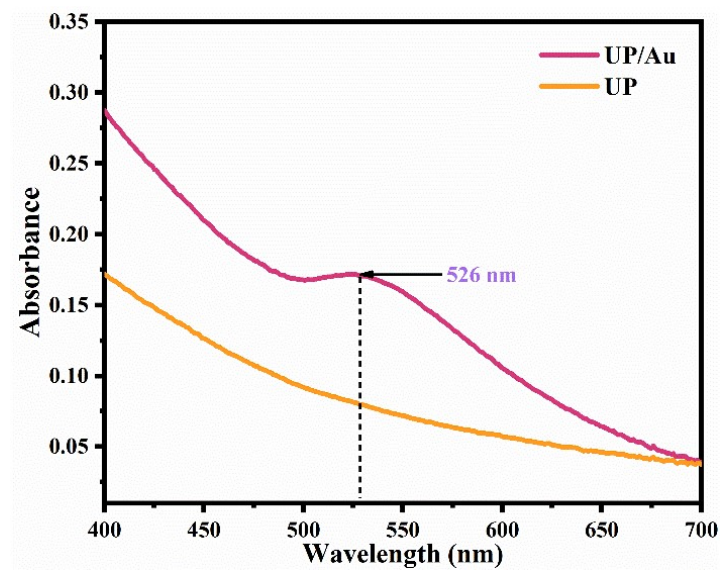

**Figure S6** UV-vis spectra of UP before and after AuNP loading

A detailed analysis of the energy transfer existing in NaErF<sub>4</sub>:0.5%Tm@NaGdF<sub>4</sub>:40%Yb UCNPs reveals that the photon population of the <sup>4</sup>I<sub>11/2</sub> energy state of a given Er<sup>3+</sup> can be achieved through direct excitation (<sup>4</sup>I<sub>15/2</sub>→<sup>4</sup>I<sub>11/2</sub>) or energy transfer from the <sup>4</sup>I<sub>11/2</sub> energy state of adjacent Er<sup>3+</sup> ions. The energy value of the <sup>3</sup>H<sub>5</sub> energy state of Tm<sup>3+</sup> is slightly lower than that of the <sup>4</sup>I<sub>11/2</sub> energy state of Er<sup>3+</sup>, enabling the <sup>3</sup>H<sub>5</sub> energy state of Tm<sup>3+</sup> to capture the energy of the <sup>4</sup>I<sub>11/2</sub> energy state of Er<sup>3+</sup> and undergo an energy transfer process of <sup>4</sup>I<sub>11/2</sub> (Er<sup>3+</sup>) →<sup>3</sup>H<sub>5</sub> (Tm<sup>3+</sup>), thereby reducing the migration of Er<sup>3+</sup> energy to surface defects. Subsequently, reverse energy transfer (EBT) occurs from the <sup>3</sup>H<sub>5</sub> energy state of Tm<sup>3+</sup> to the <sup>4</sup>I<sub>13/2</sub> energy state of Er<sup>3+</sup>, leading to an electron transition to the <sup>4</sup>F<sub>9/2</sub> state and then back to the ground state, enhancing the red upconversion emission. The Yb<sup>3+</sup> ions doped in the shell can absorb photons and transition from the <sup>4</sup>F<sub>7/2</sub> to the <sup>4</sup>F<sub>15/2</sub> energy state and then perform two consecutive energy transfers to Er<sup>3+</sup> (<sup>4</sup>I<sub>11/2</sub> and <sup>4</sup>F<sub>7/2</sub>), thereby enhancing the radiative electron transition of Er<sup>3+</sup> and promoting red and green light emission. The <sup>2</sup>F<sub>15/2</sub> energy level of Yb<sup>3+</sup> is almost at the same level as the <sup>4</sup>I<sub>11/2</sub> energy level of Er<sup>3+</sup>. After Yb<sup>3+</sup> absorbs photons and reaches the <sup>4</sup>F<sub>15/2</sub> energy state, it preferentially transfers energy to the <sup>4</sup>I<sub>11/2</sub> energy level of Er<sup>3+</sup> (mainly Er<sup>3+</sup> at the core-shell interface). A part of the energy released by Er<sup>3+</sup> in the <sup>4</sup>I<sub>11/2</sub> excited state is captured by the <sup>3</sup>H<sub>5</sub> energy state of Tm<sup>3+</sup>, and then a BET process of Tm<sup>3+</sup> (<sup>3</sup>H<sub>5</sub>)→Er<sup>3+</sup> (<sup>4</sup>I<sub>13/2</sub>) occurs, exciting Er<sup>3+</sup> to transition to the <sup>4</sup>F<sub>9/2</sub> energy state. The result reveal that UCNP has bright red fluorescence at 655 nm.



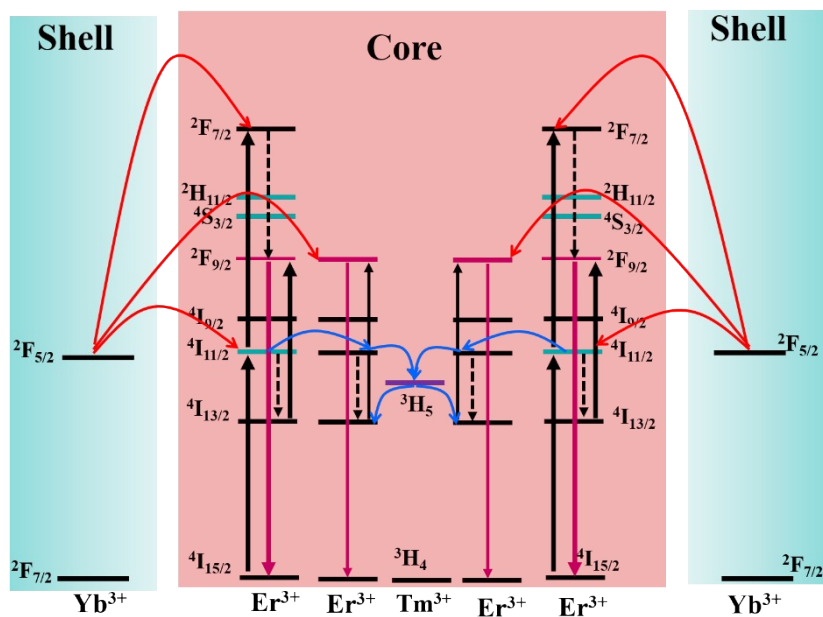

**Figure S7** Schematic diagram of energy transfer inside the core-shell UCNP (black solid arrows, red arrows, blue arrows, and wine red arrows represent photon excitation, energy transfer, and radiation emission, respectively)

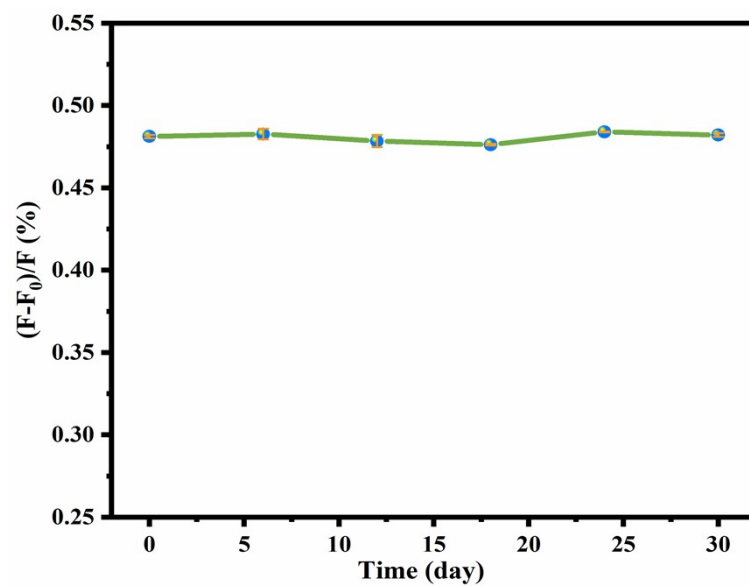

**Figure S8** Stability of UP/Au-ssDNA2. The quenching efficiency was calculated via the formula  $(F-F_0)/F$ , where  $F_0$  and  $F$  represent the fluorescence values of the system before and after ssDNA2 was added, respectively.
